# Supplementary material for: Cancer-specific PERK signaling drives invasion and metastasis through CREB3L1
Source: PubMed Central journal article supplement (PMC5651903; doi:10.1038/s41467-017-01052-y), 2017-10-20
Supplement: 41467_2017_1052_MOESM3_ESM.pdf [file 41467_2017_1052_MOESM3_ESM.pdf]

## **Description of Additional Supplementary Files**

File Name: Supplementary Data 1

Description: A list of ~400 genes up-regulated by PERK signaling according to a previous report (Reference #20 of the revised manuscript).
